# Supplementary material
Source: publisher figshare collection journal article supplement (https://gsapubs.figshare.com/ndownloader/files/23300591)
Supplement: Supplementary file 1 [file 23300591]

## Sheet: Sandur_highland
KMK-2		J = 0.00402950 ± 0.00000363		Spectro : ARGUS IV
Relative Abundances			36Ar [mV]	%1s	37Ar [mV]	%1s	38Ar [mV]	%1s	39Ar [mV]	%1s	40Ar [mV]	%1s	40(r)/39(k)	± 2s	Age	± 2s	40Ar(r)	39Ar(k)	K/Ca	± 2s
															(Ma)		(%)	(%)
48_KMK-2_	3.5	4	1.18397	0.51076	231.858	72.4258	0.321517	6.38602	4.95915	0.668207	371.003	0.252438	8.52452	6.07881	61.0719	42.823	11.0073	1.45517	0.00888454	0.012878
49_KMK-2_	4	4	0.568099	0.690936	134.911	172.43	0.257978	9.83723	6.5291	0.549567	201.683	0.467896	7.03545	6.19151	50.5514	43.8714	22.4338	1.95346	0.0204975	0.0706959
51_KMK-2_	4.5	4	0.276233	1.14864	265.963	60.9777	0.266695	9.40654	13.0153	0.627688	148.936	0.627118	7.00618	2.17753	50.344	15.4312	60.3164	3.89473	0.0207301	0.0252857
52_KMK-2_	5	4	0.0984086	3.02265	303.851	62.665	0.235604	8.70733	15.1215	0.301249	107.768	0.86563	7.00719	2.19461	50.3512	15.5521	96.8854	4.52615	0.0210869	0.0264314
53_KMK-2_	5.3	4	0.0963079	3.18729	216.002	93.5596	0.271663	7.76918	14.6165	0.193489	114.384	0.818572	7.05201	2.3437	50.6688	16.6058	91.0828	4.48758	0.0287846	0.053865
55_KMK-2_	5.6	4	0.0999899	2.9791	29.7181	649.669	0.242839	8.83967	14.5395	0.185435	121.841	0.766063	6.52232	2.27418	46.9118	16.1467	77.7164	4.4099	0.210064	2.72945
56_KMK-2_	5.9	4	0.138067	2.22846	-169.599	90.8233	0.607563	4.60883	44.8391	0.130344	369.885	0.259629	6.8398	0.576277	49.1645	4.08648	84.9499	13.9544	-0.113997	0.207074
57_KMK-2_	6.2	4	0.191285	1.63888	143.107	85.817	1.33797	1.75217	100.952	0.114788	758.607	0.123051	6.92242	0.206646	49.7504	1.46489	94.0256	31.2989	0.303024	0.520094
4_KMK-2_	6.5	4	0.0770691	11.2468	294.577	98.9242	0.447991	5.97282	33.3118	0.127993	219.742	1.16133	6.55654	1.48708	47.1548	10.5569	100.901	10.2721	0.0483133	0.0955893
5_KMK-2_	7	4	0.0584562	14.8217	403.339	72.4291	0.289683	11.7447	21.7183	0.152016	117.286	2.17574	6.26068	2.35533	45.0533	16.7401	114.366	6.50799	0.0228413	0.0330906
6_KMK-2_	8	4	0.0724425	12.0807	617.611	48.0979	0.309285	10.266	22.86	0.140405	114.725	2.22438	6.49998	2.29767	46.7532	16.3149	126.974	6.80747	0.0156032	0.0150128
8_KMK-2_	9.5	4	0.0912916	9.52466	704.079	40.7517	0.33884	7.87756	21.1375	0.219245	103.39	2.46859	6.60114	2.41926	47.4714	17.1715	131.689	6.26516	0.0125966	0.0102701
9_KMK-2_	12	4	0.0525406	16.4971	573.199	66.5709	0.217093	14.1516	14.1349	0.356647	76.3872	3.34182	7.98376	4.79143	57.2584	33.8251	143.379	4.16699	0.0102911	0.0137083
		S	3.00415	0.733835	3748.62	23.0753	5.14472	1.83307	327.735	0.0595837	2825.64	0.222759
KPA-8		J = 0.0039438 ± 0.00000355		Spectro : ARGUS IV
Relative Abundances			36Ar [mV]	%1s	37Ar [mV]	%1s	38Ar [mV]	%1s	39Ar [mV]	%1s	40Ar [mV]	%1s	40(r)/39(k)	± 2s	Age	± 2s	40Ar(r)	39Ar(k)	K/Ca	± 2s
															(Ma)		(%)	(%)
31_KPA-8B_	3		2.80892	0.536037	234.322	130.296	0.659369	3.54193	3.20068	0.820252	843.83	0.0722869	11.131	17.5956	77.6895	120.208	3.99733	1.52272	0.00556089	0.0145145
32_KPA-8B_	3.5		2.6899	0.549529	195.281	150.75	0.67111	4.11643	7.48457	0.410804	829.341	0.0676109	7.10266	7.13672	49.9572	49.5097	6.15462	3.61113	0.0161681	0.0487561
33_KPA-8B_	4	4	1.77382	0.53253	261.405	118.841	0.51205	5.93046	10.4825	0.495384	574.409	0.0955699	7.18749	5.30643	50.5456	36.8005	12.6049	5.0619	0.0169307	0.0402485
35_KPA-8B_	4.5	4	0.496228	0.761413	97.7401	380.046	0.257494	9.15719	13.0804	0.307122	212.94	0.25936	5.8508	4.97662	41.2517	34.691	34.9847	6.39807	0.0572336	0.435035
36_KPA-8B_	5	4	0.289784	0.90265	213.479	232.238	0.245755	6.53532	11.2219	0.282256	142.624	0.385944	6.78306	7.64231	47.7387	53.0823	52.6322	5.56093	0.0222911	0.103547
37_KPA-8B_	5.2	4	0.311254	0.8471	130.124	250.994	0.264098	12.3423	12.4283	0.238326	162.459	0.337197	6.60376	4.51844	46.4928	31.406	50.1351	6.1976	0.0407573	0.204603
39_KPA-8B_	5.4	4	0.186809	1.81003	23.8096	913.916	0.969266	2.10896	71.9956	0.13359	593.518	0.148196	7.49733	0.517364	52.6931	3.58369	90.9232	36.1686	1.29993	23.7605
40_KPA-8B_	5.6	4	0.0683805	3.43902	-745.345	46.3848	0.388542	7.19468	32.4428	0.200289	364.397	0.453608	8.68685	1.84452	60.914	12.7187	76.9597	16.222	-0.0190293	0.0176561
41_KPA-8B_	5.8		0.0430701	2.52262	-813.854	69.6544	0.157897	15.3608	12.9444	0.370733	248.414	0.0634799	12.5521	7.34728	87.3721	49.9266	66.942	6.65712	-0.0071518	0.00997282
43_KPA-8B_	6		0.0425698	2.40715	-572.742	96.3086	0.113648	26.4581	8.10058	0.636835	181.027	0.0851158	14.3504	11.3644	99.5508	76.706	66.0799	4.18869	-0.00639432	0.0123316
44_KPA-8B_	6.5		0.0562862	1.24165	-483.318	65.1922	0.175737	11.0125	9.27267	0.518815	174.734	0.0913409	12.1445	5.62442	84.6001	38.278	66.8897	4.83601	-0.00856235	0.0111718
45_KPA-8B_	8		0.0601309	1.32177	-240.188	109.146	0.105682	20.5007	7.09495	0.579047	172.094	0.0891388	18.8074	6.36101	129.386	42.232	77.7562	3.57521	-0.0130144	0.028418
		S	8.82715	0.273494	-1699.29	77.3432	4.52065	1.93387	199.749	0.0870931	4499.78	0.0521153
							TABLE DR2
